# Supplementary material for: Taming the wild: resolving the gene pools of non-model Arabidopsis lineages
Source: PubMed Central journal article supplement (PMC4216345; doi:10.1186/s12862-014-0224-x), 2014-10-27

Corresponding to Fig. 5 A, upper part  
*Lyrata* group, diploids, LocPrior  
288 individuals, 72 accessions

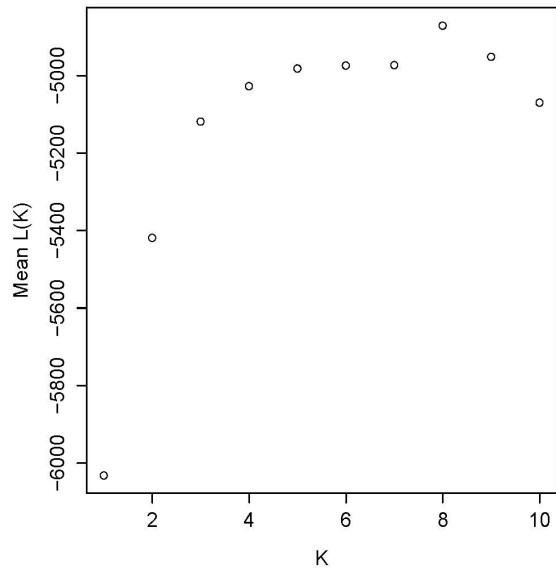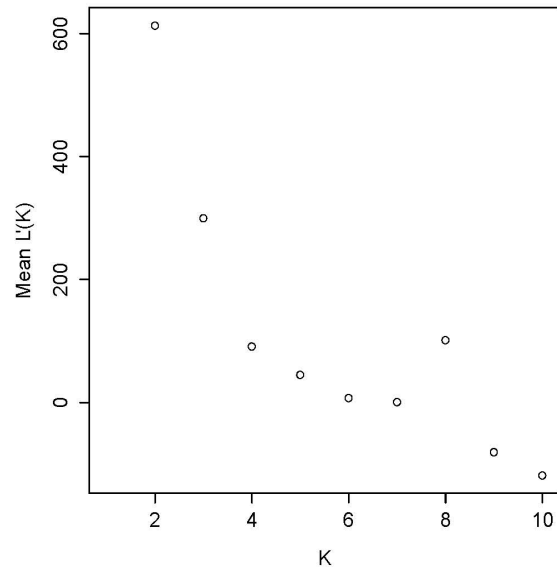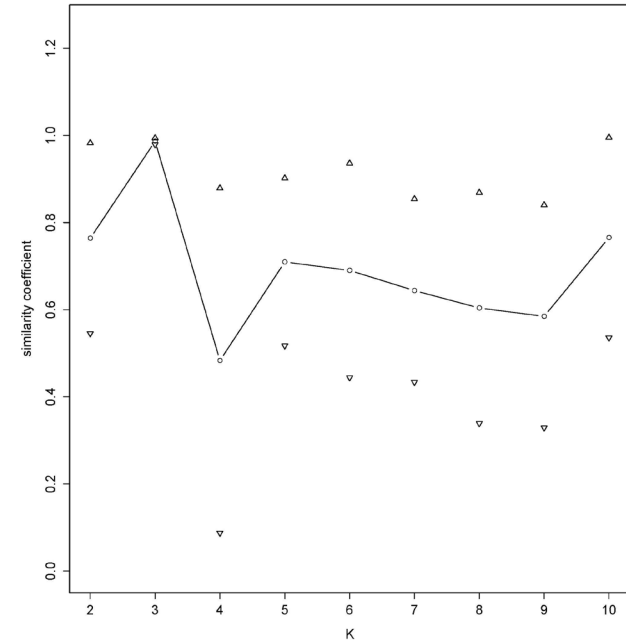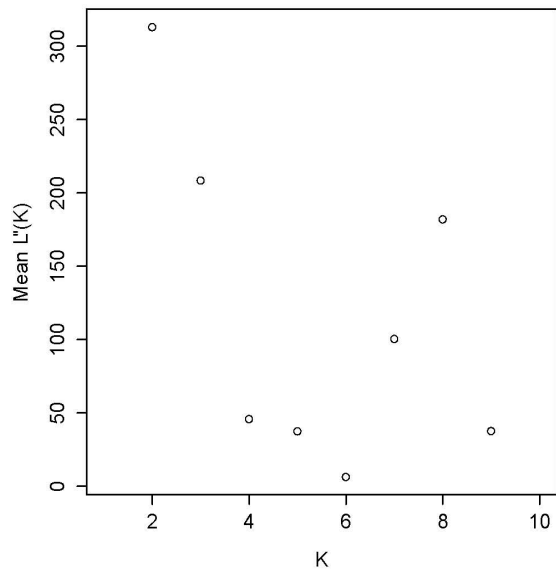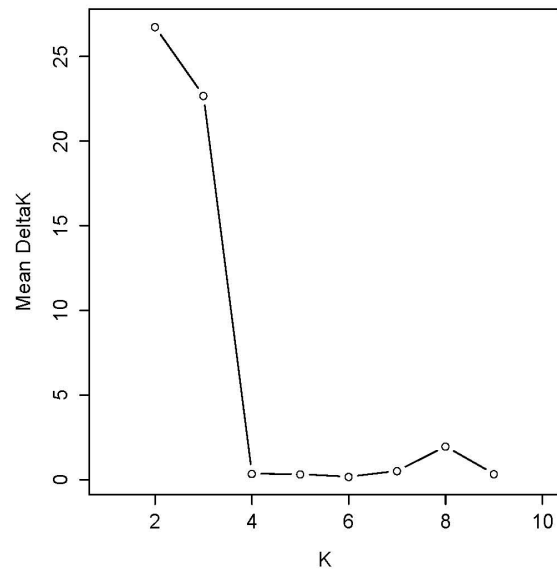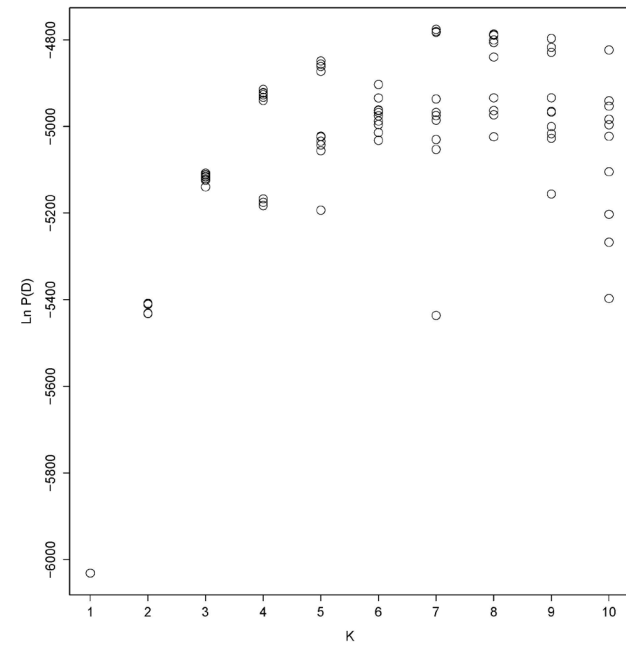

**Corresponding to Fig. 5 A, upper part**  
*Arenosa* group, diploids, LocPrior  
 258 individuals, 28 accessions

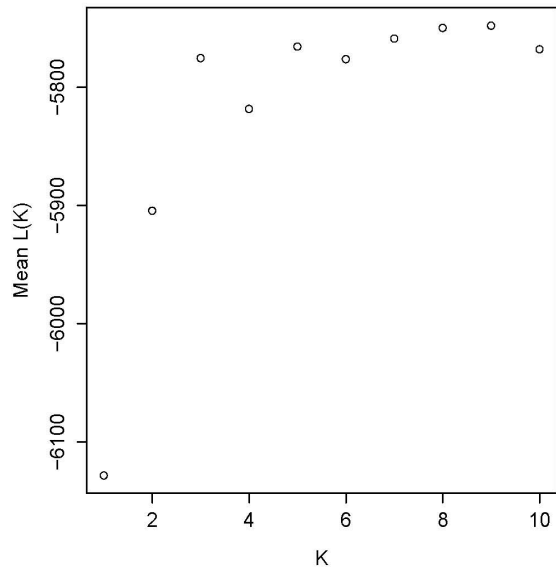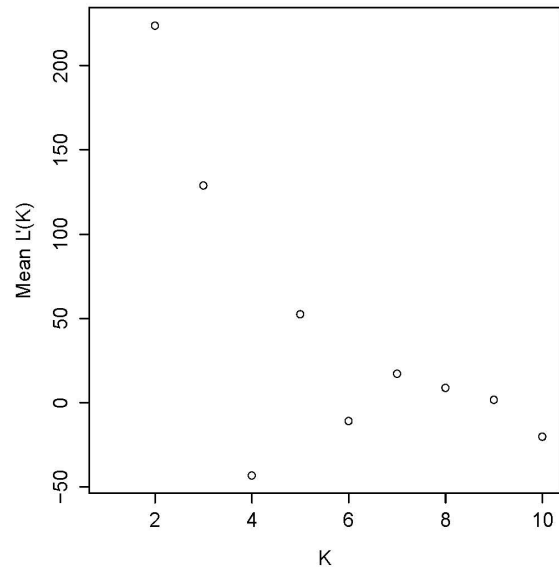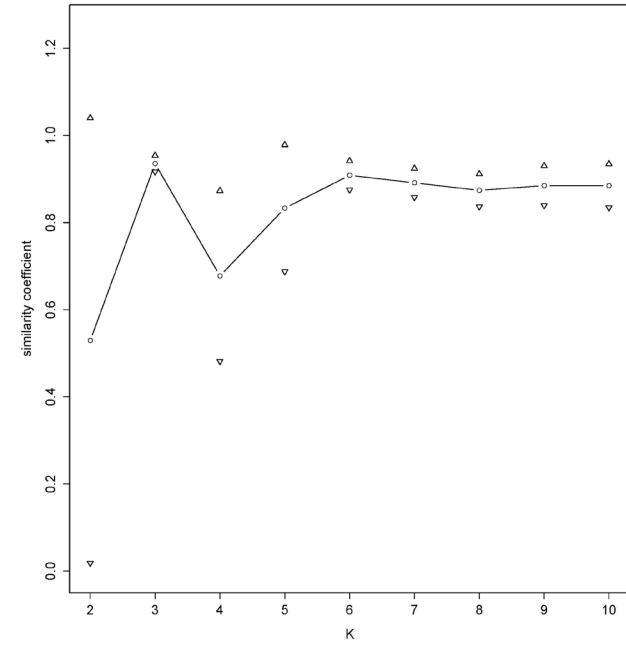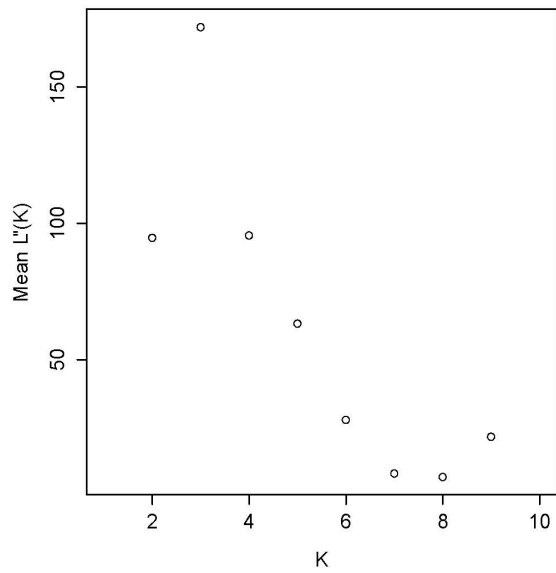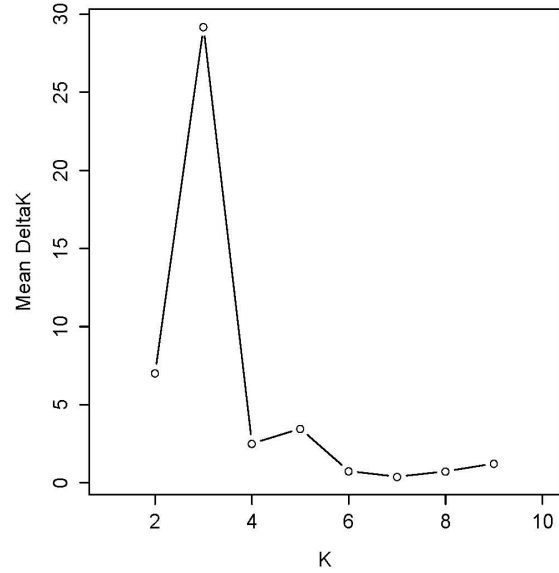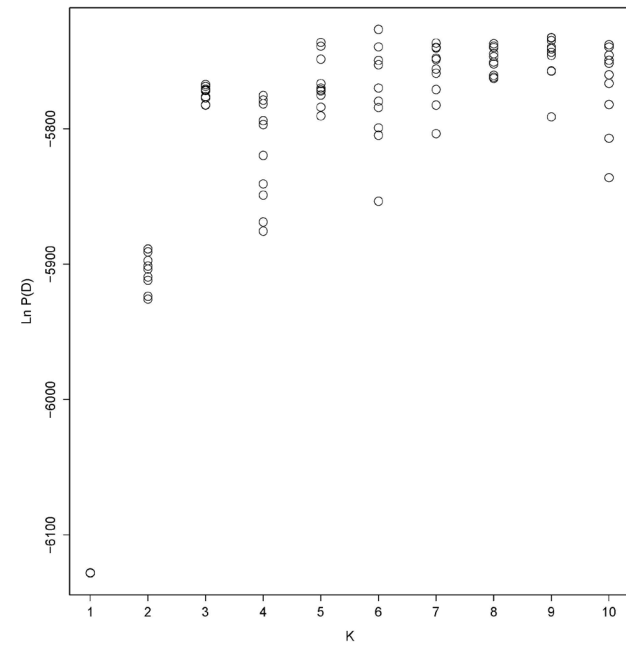

**Corresponding to Fig. 5 A, upper part**  
*Halleri* group, diploids, LocPrior  
 259 individuals, 38 accessions

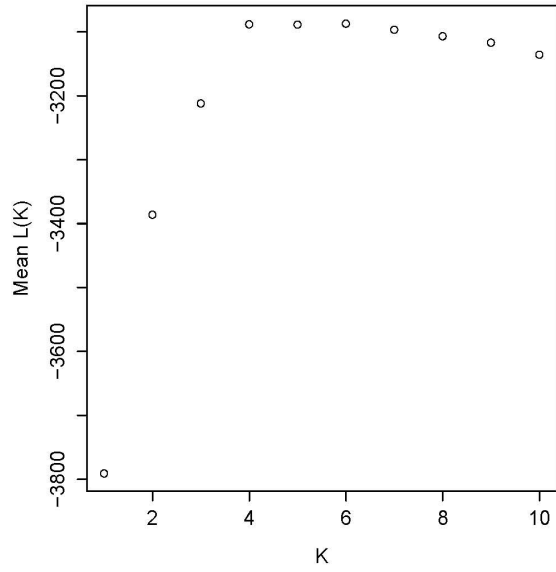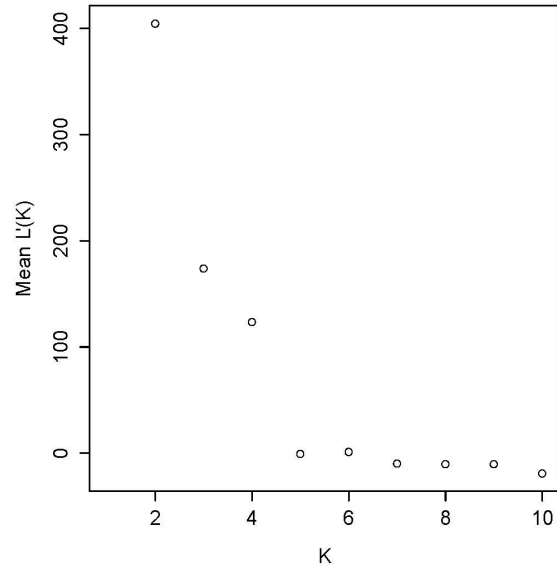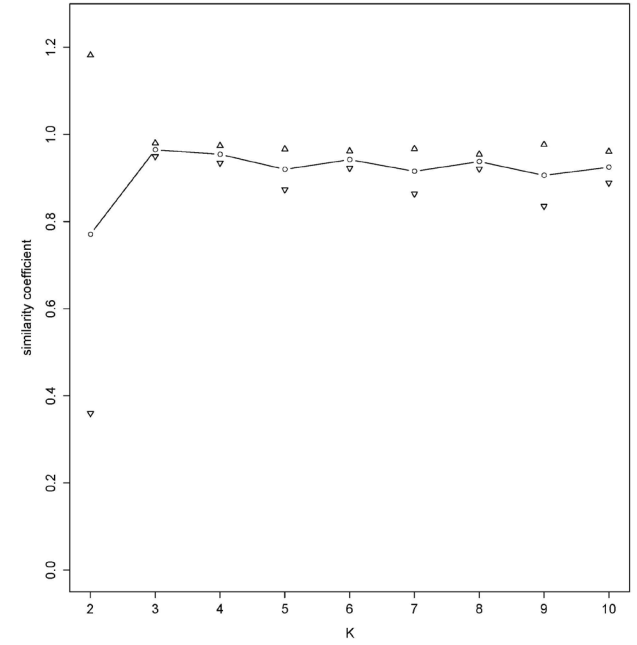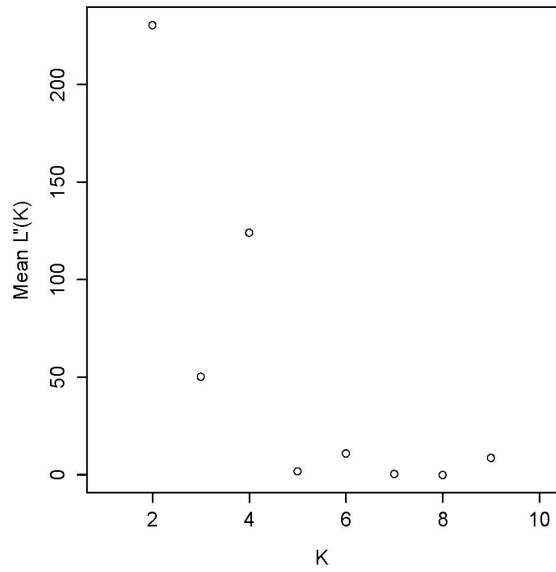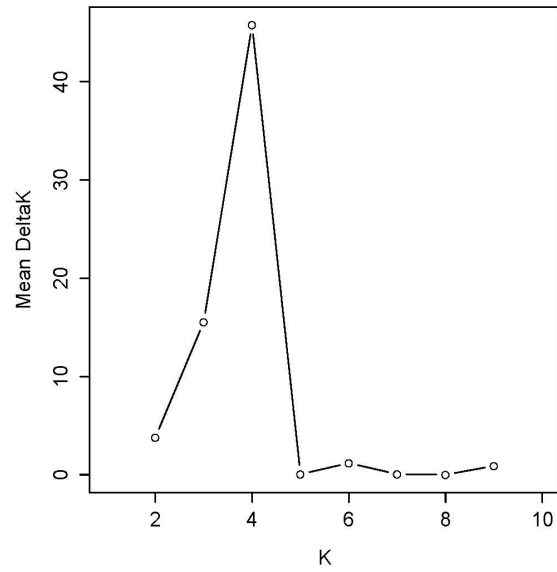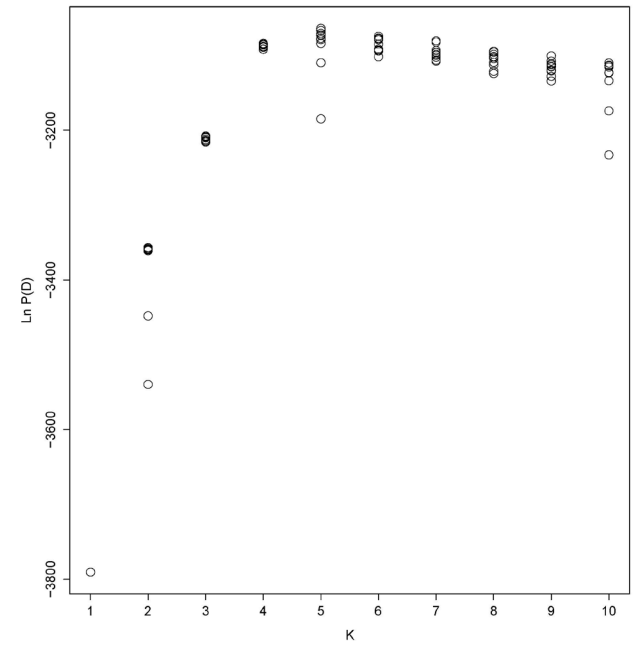

**Corresponding to Fig. 5 A, lower part**  
 Complete dataset, diploids, no LocPrior  
 998 individuals, 158 accessions

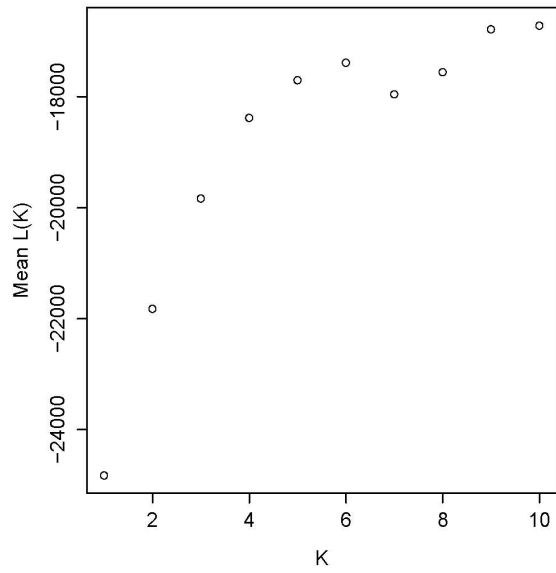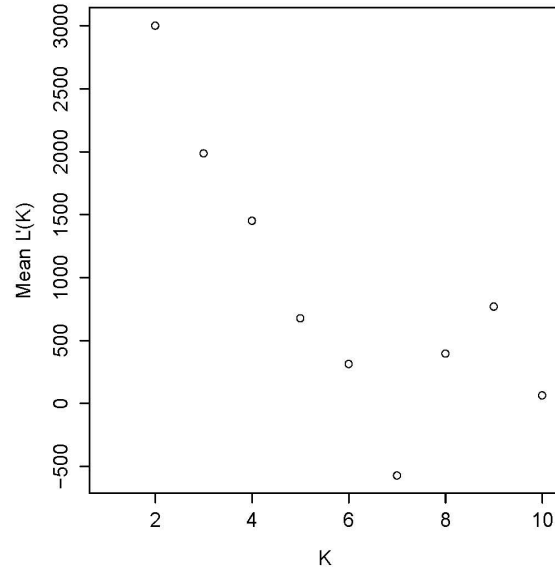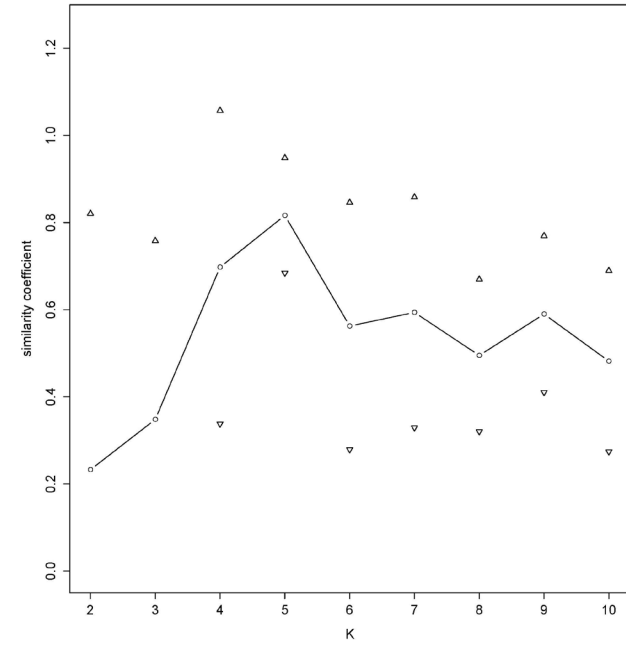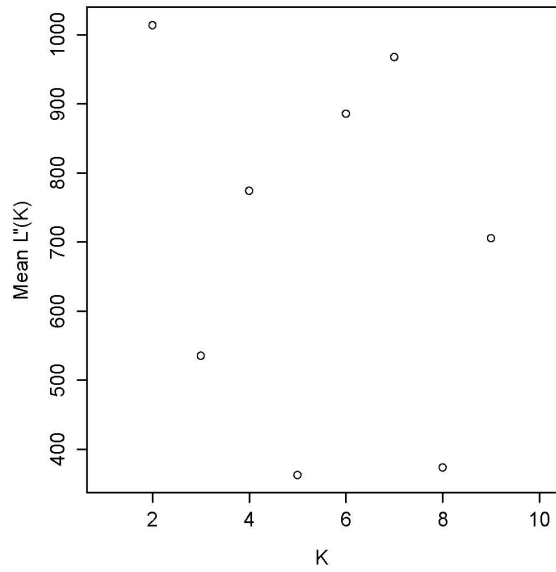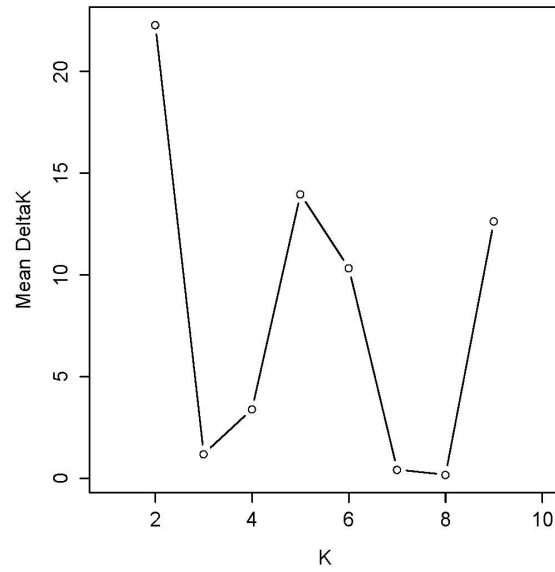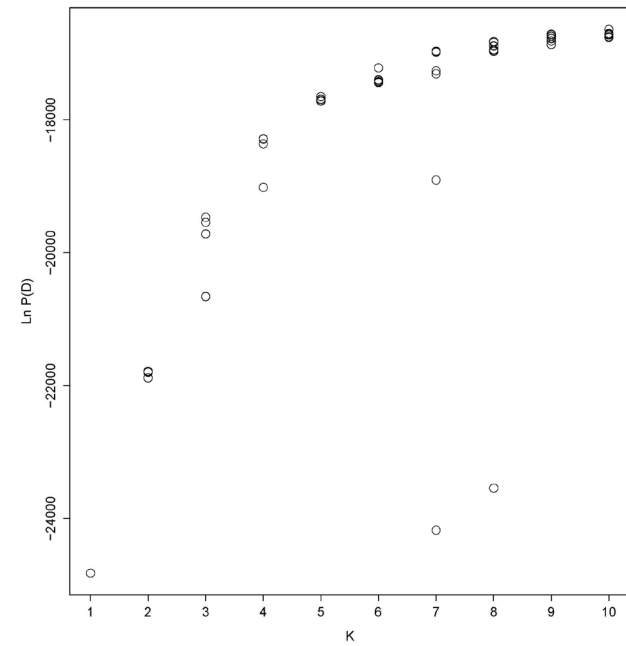

**Corresponding to Fig. 5 B, upper part**  
 Complete dataset, diploids and tetraploids, no LocPrior  
 1345 individuals, 222 accessions

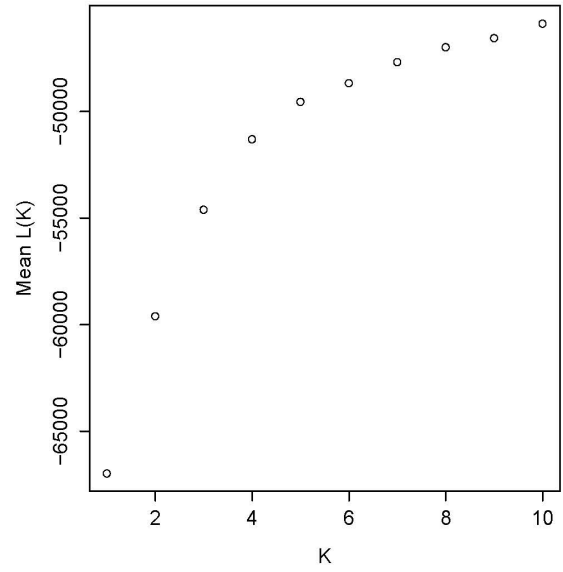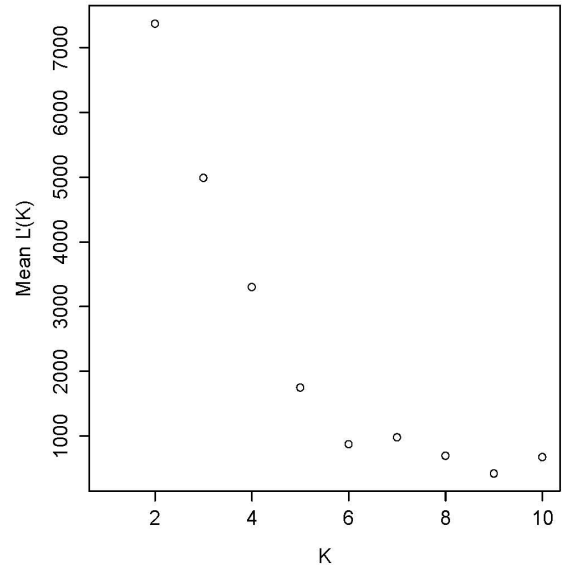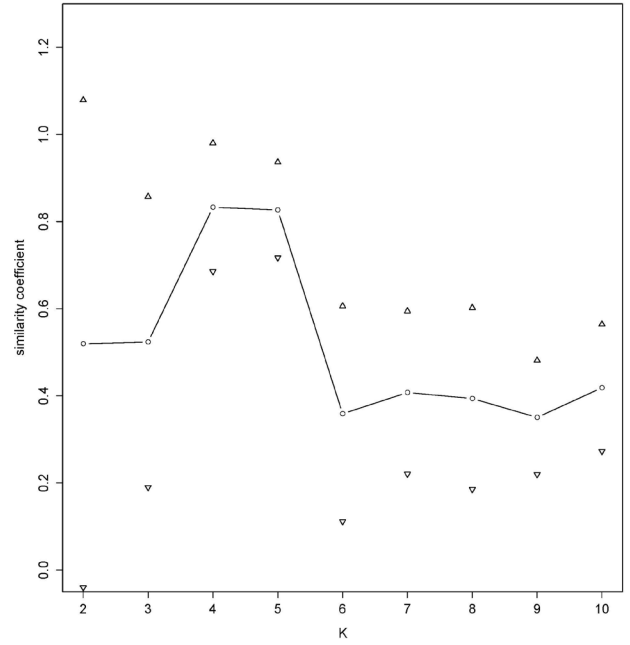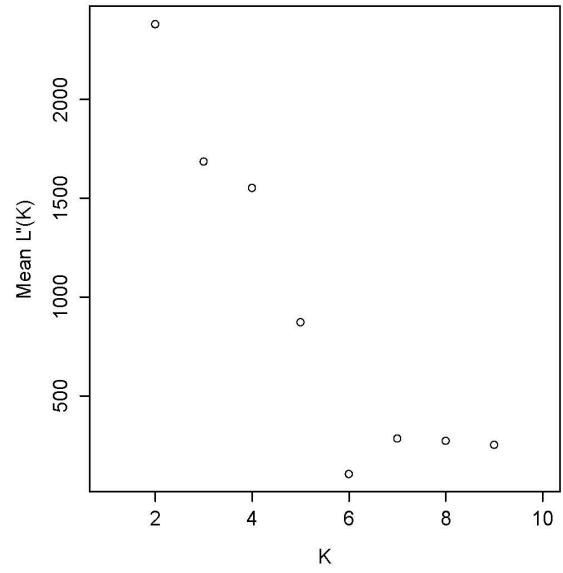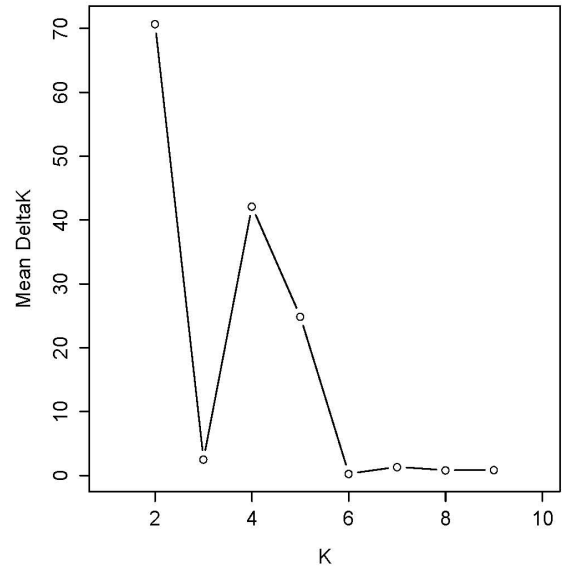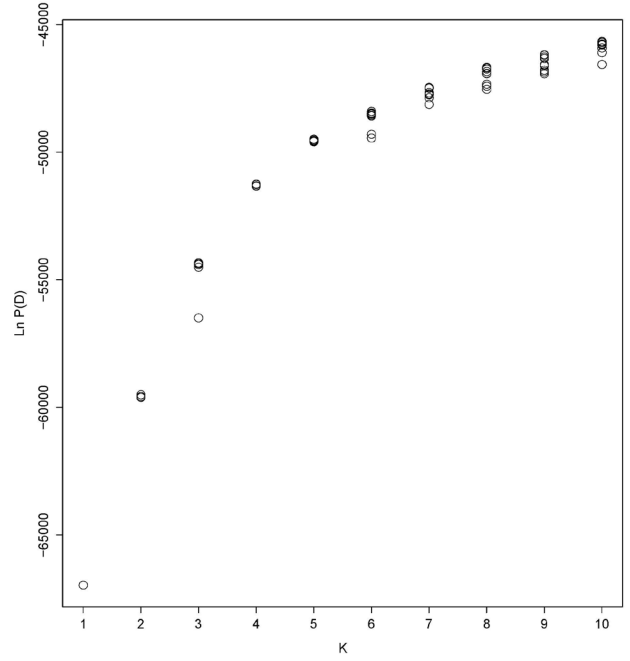

**Corresponding to Fig. 5 B, lower part**  
*Lyrata* group, diploids and tetraploids, LocPrior  
 321 individuals, 85 accessions

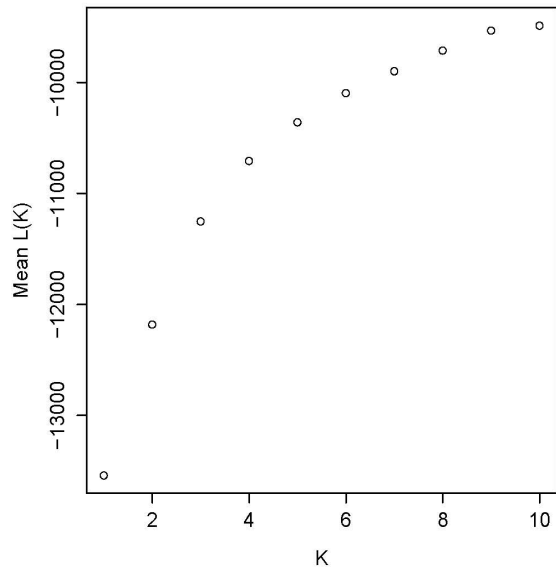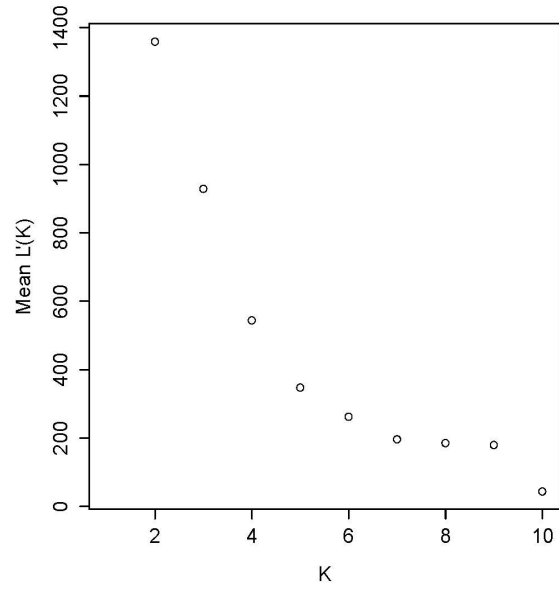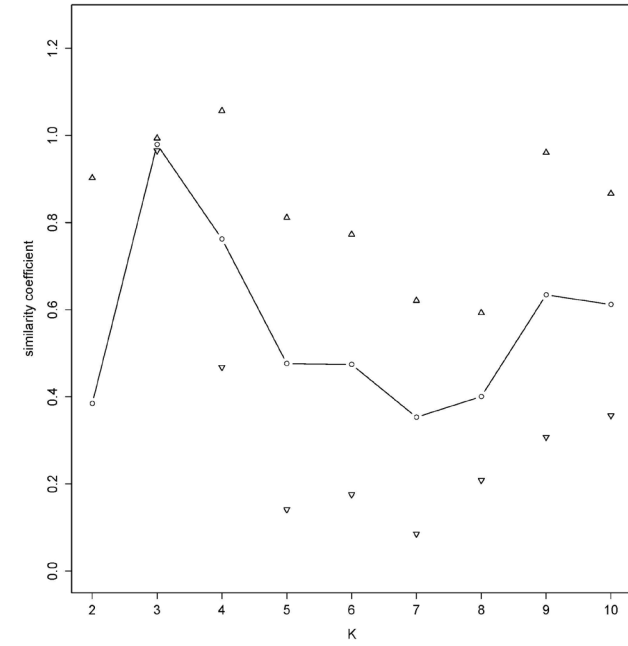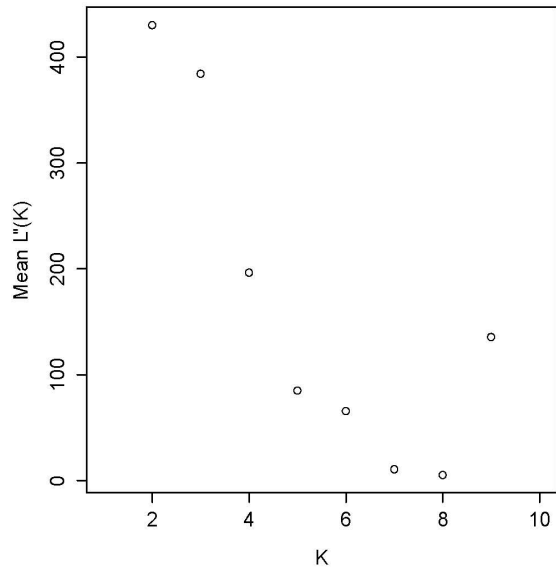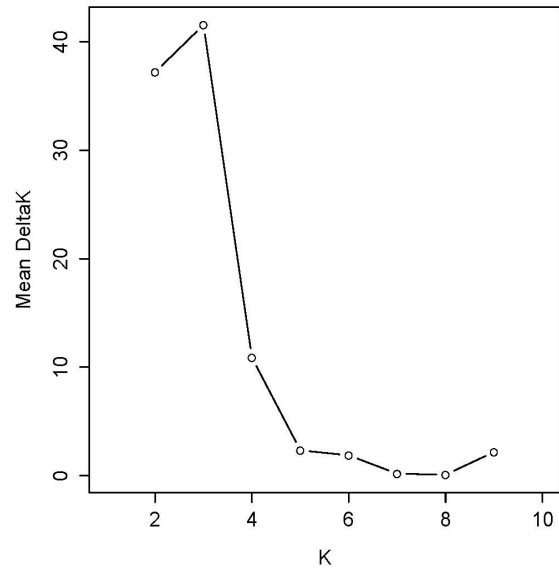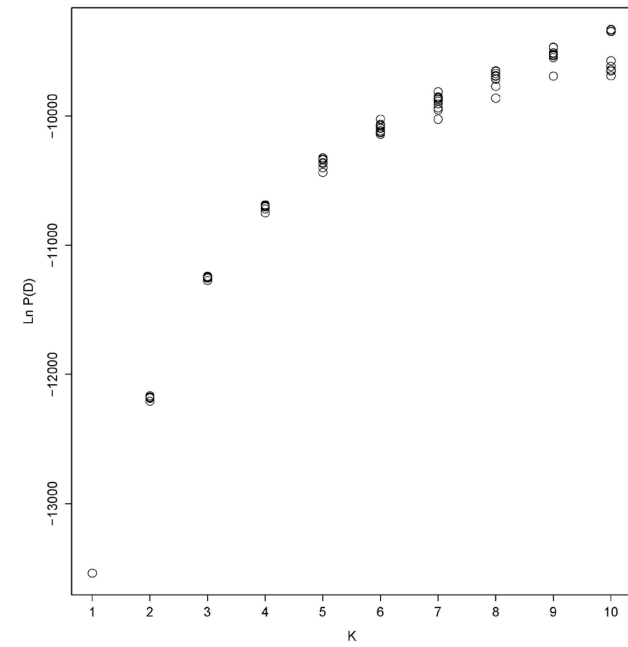

**Corresponding to Fig. 5 B, lower part**  
*Arenosa* group, diploids and tetraploids, LocPrior  
 572 individuals, 79 accessions

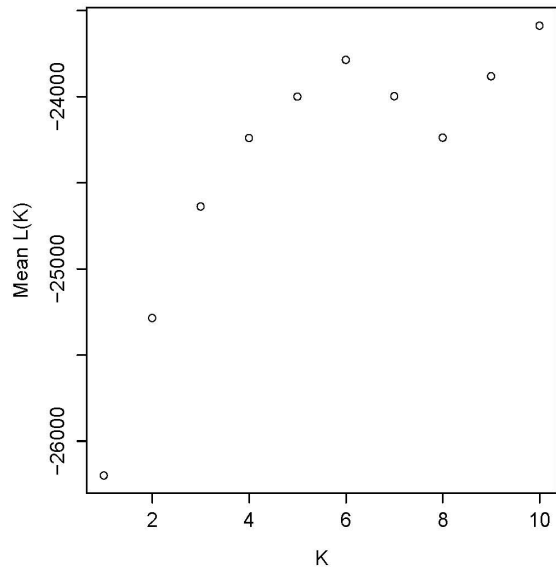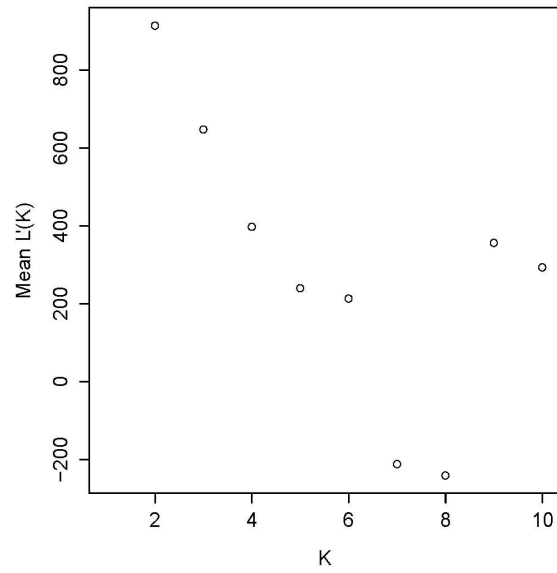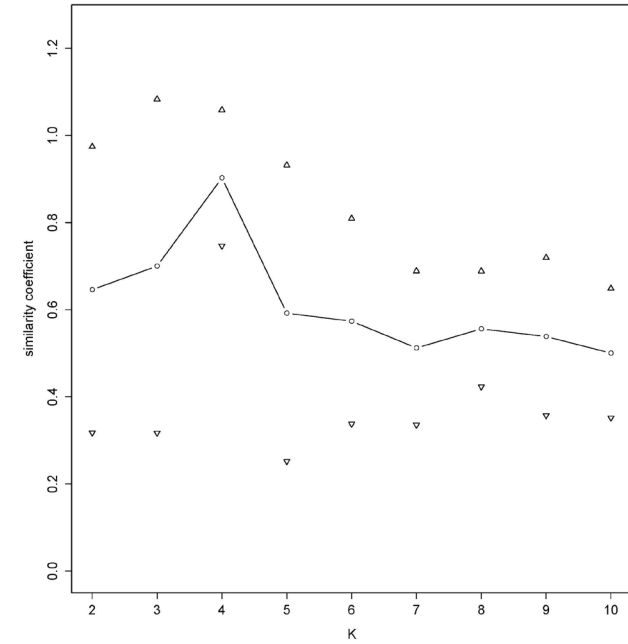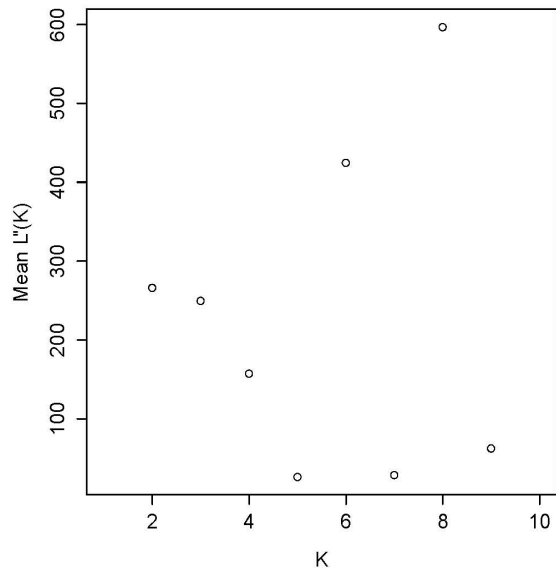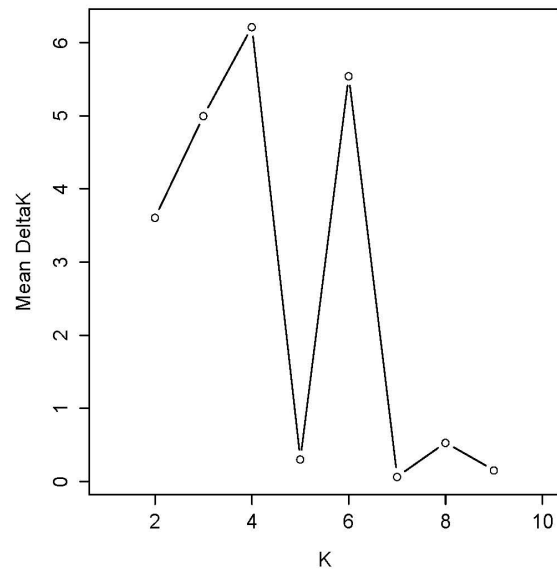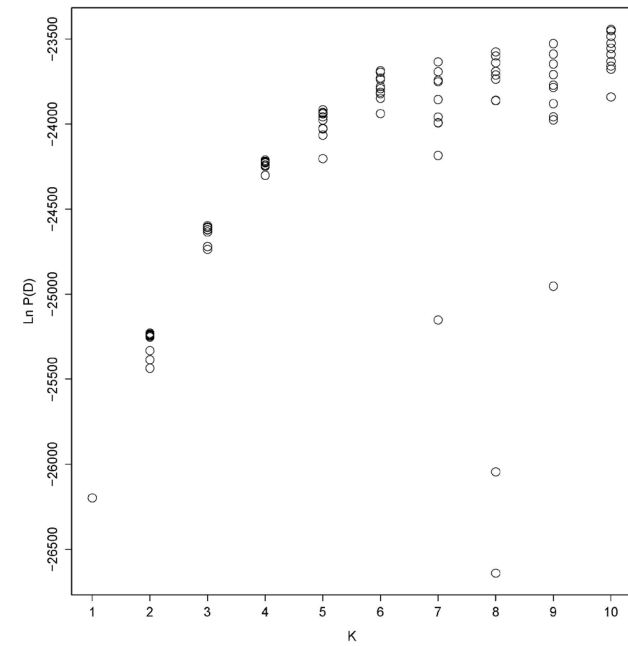

**Corresponding to Fig. 5 C, upper part**  
 Complete dataset, tetraploids, no LocPrior  
 347 individuals, 64 accessions

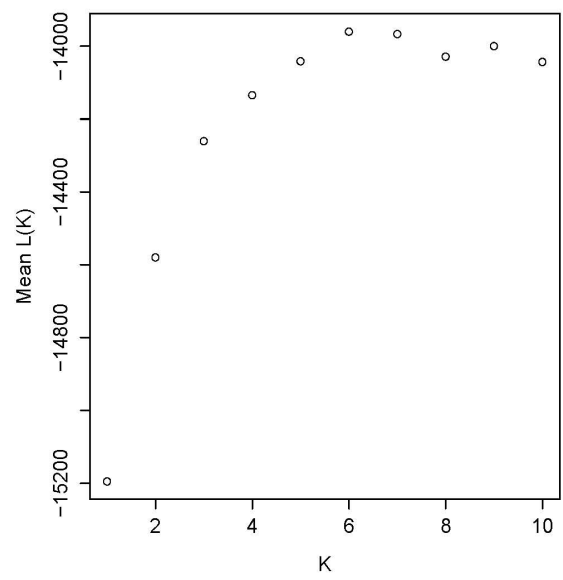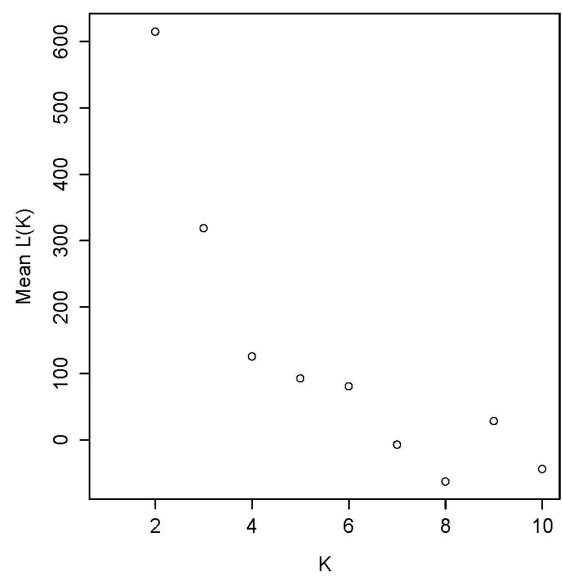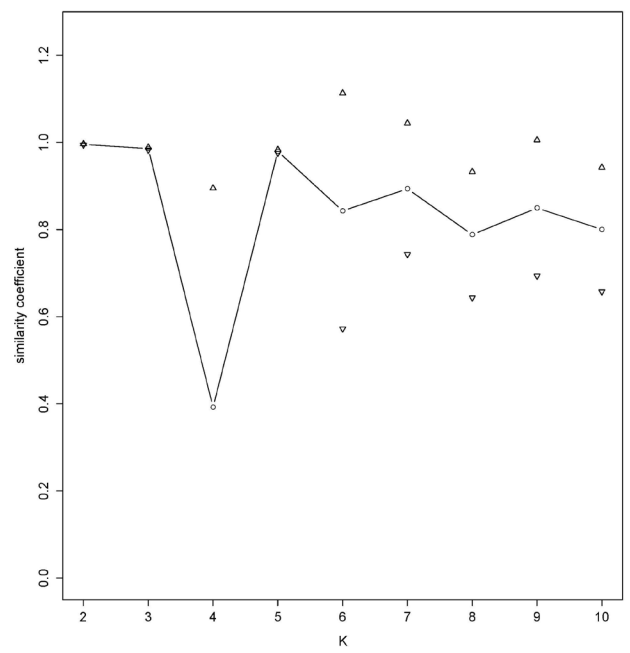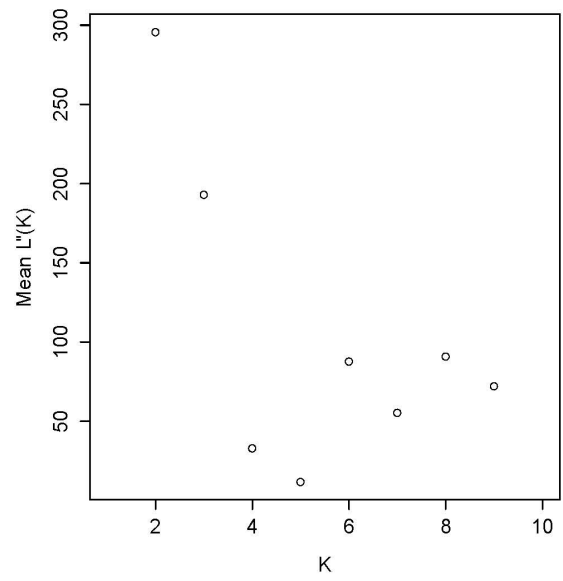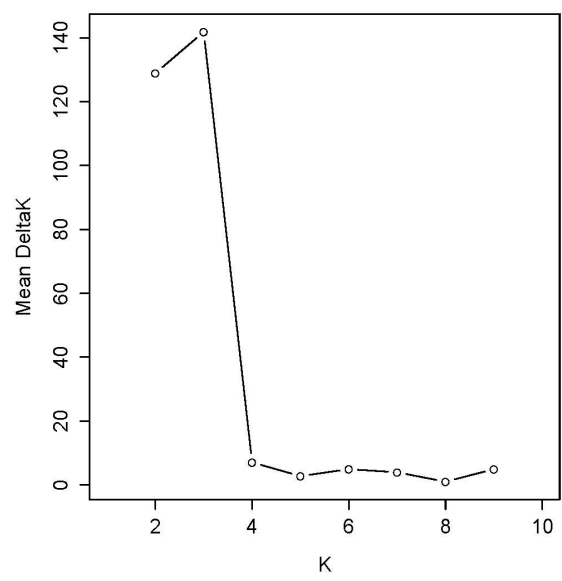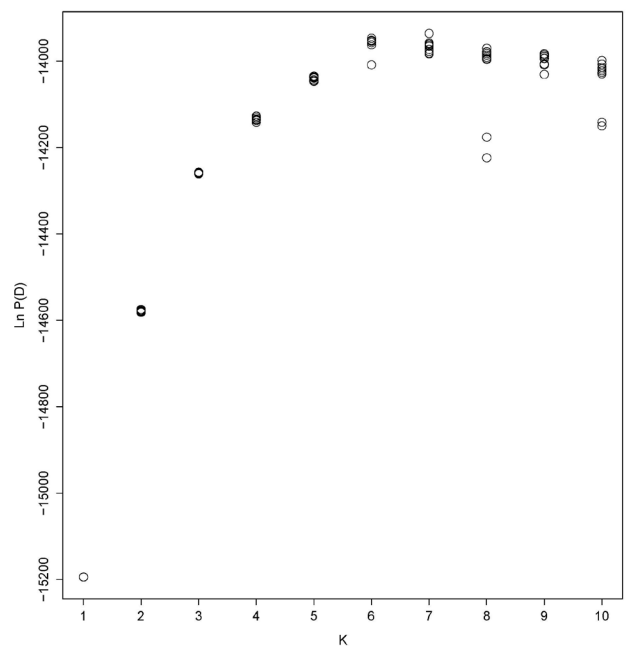



**Corresponding to Fig. 5 C, lower part**  
*Lyrata* group, tetraploids, LocPrior  
 33 individuals, 13 accessions

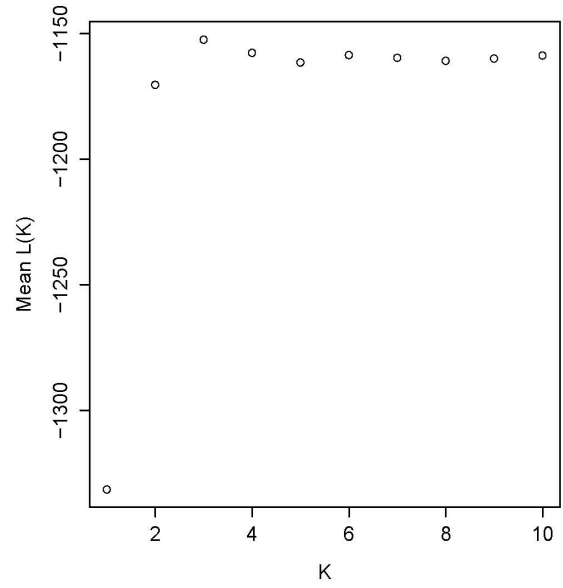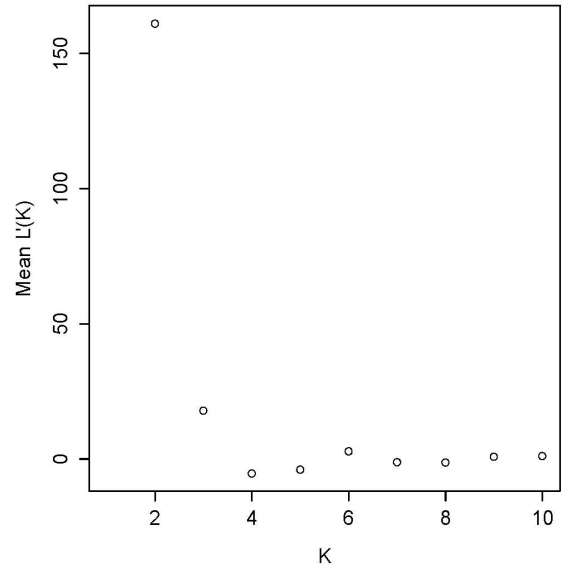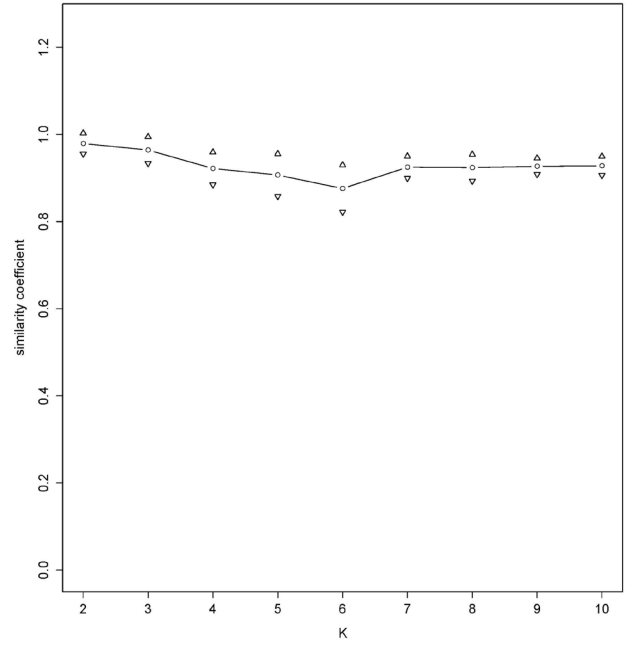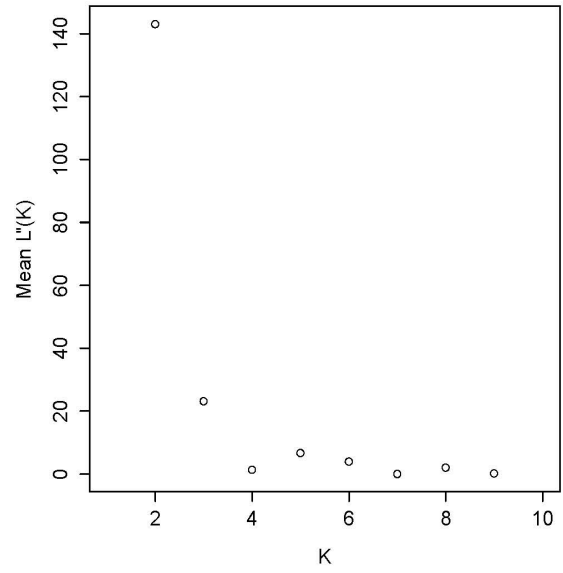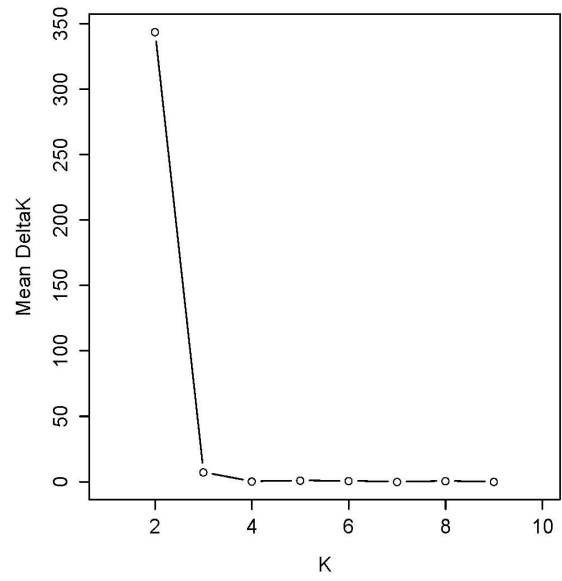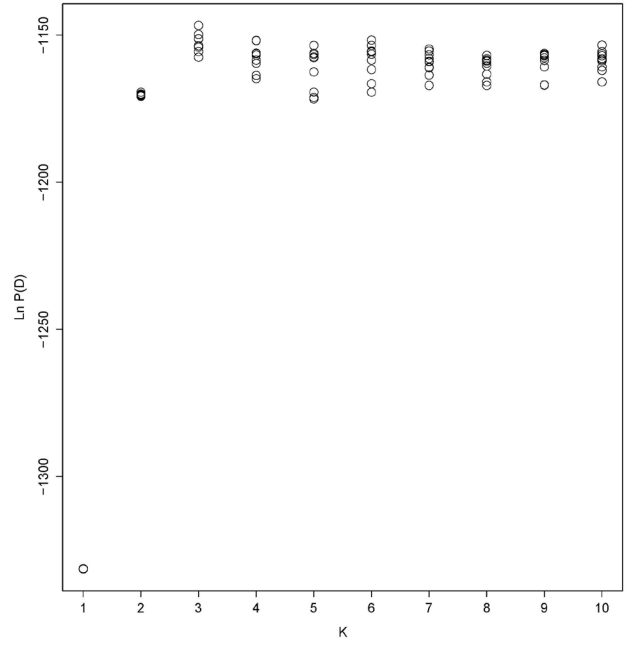

**Corresponding to Fig. 5 C, lower part**  
*Arenosa* group, tetraploids, LocPrior  
 314 individuals, 51 accessions

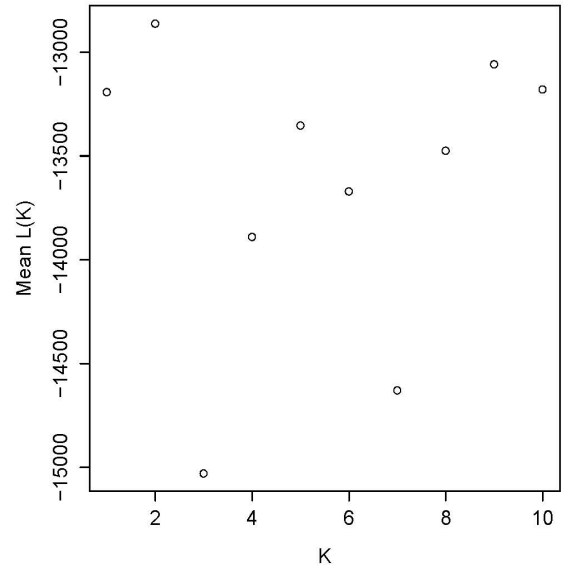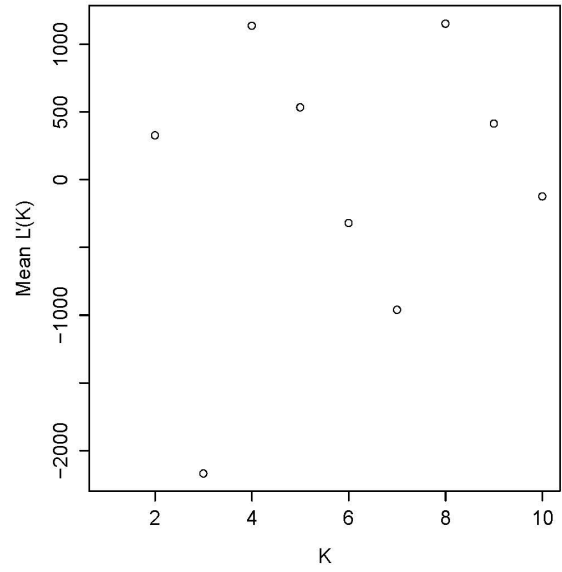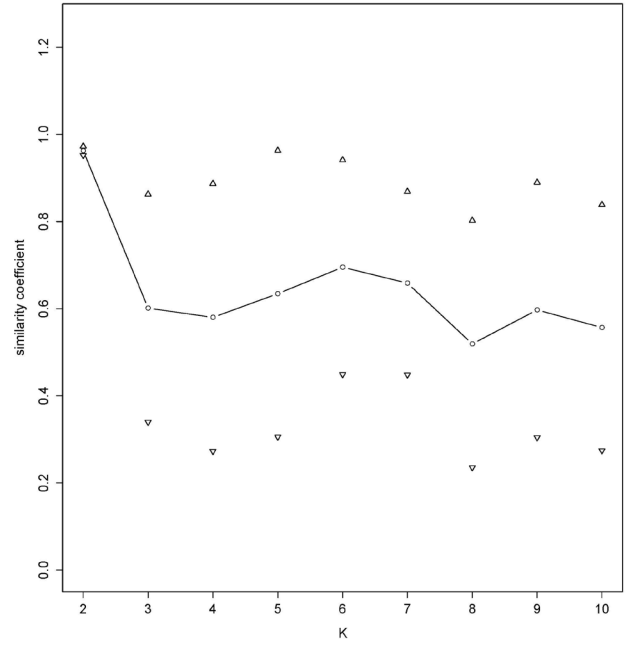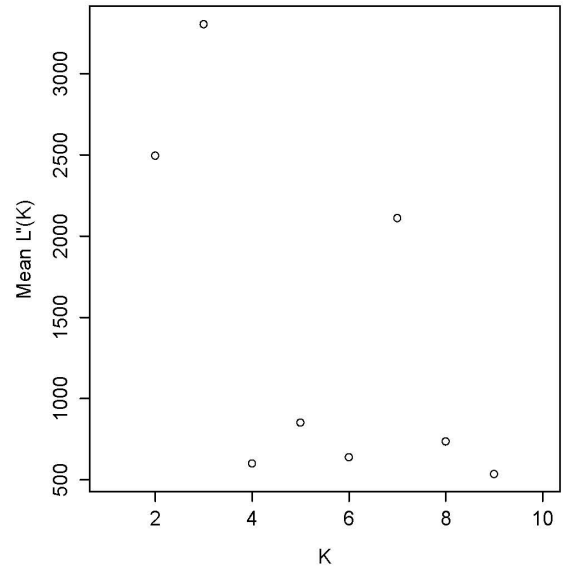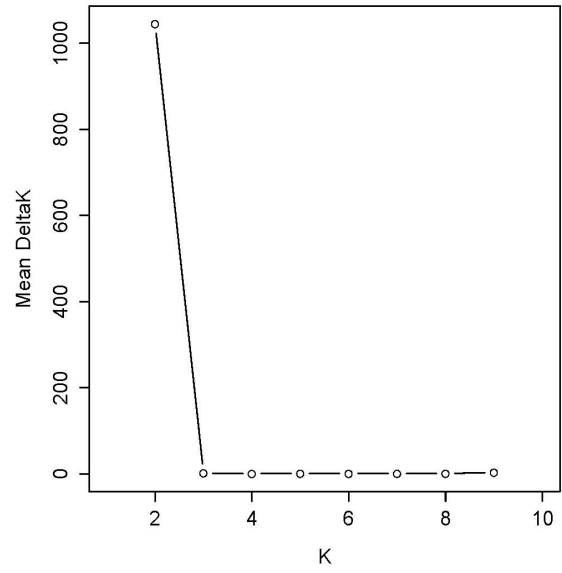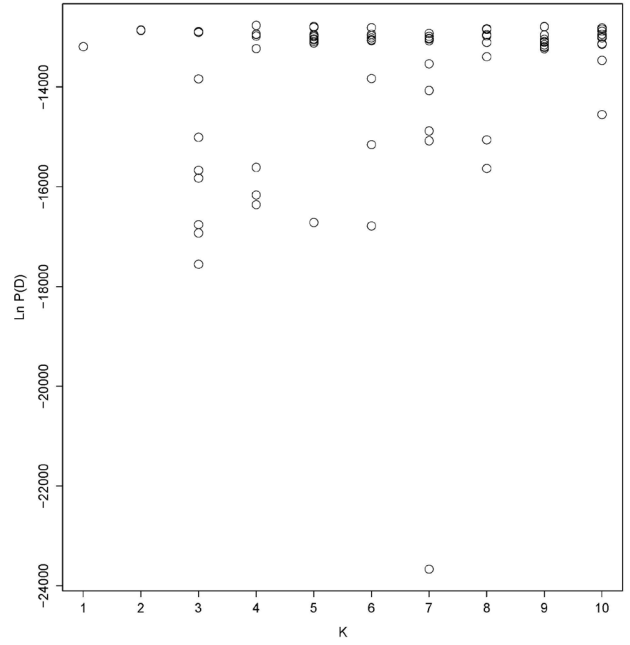

Supplement: 12862_2014_224_MOESM4_ESM.pdf [file 12862_2014_224_MOESM4_ESM.pdf]
